# Supplementary material for: Microbiota Composition of Mucosa and Interactions between the Microbes of the Different Gut Segments Could Be a Factor to Modulate the Growth Rate of Broiler Chickens
Source: MDPI journal article supplement (doi:10.3390/ani12101296), 2022-05-18
Supplement: s1 [file s1]

# Microbiota Composition of Mucosa and Interactions between the Microbes of the Different Gut Segments Could Be a Factor to Modulate the Growth Rate of Broiler Chickens

Supplementary Materials

\* Corresponding author: Prof. Károly Dublec

E-mail address: [dublec.karoly@uni-mate.hu](mailto:dublec.karoly@uni-mate.hu)

**Supplemental Table S1.** Composition of diets (starter, grower and finisher) fed to the experimental chicks.

|                                       | <b>Starter Diet<br/>(day 1-14)</b> | <b>Grower Diet<br/>(day 15-32)</b> | <b>Finisher Diet<br/>(day 33-37)</b> |
|---------------------------------------|------------------------------------|------------------------------------|--------------------------------------|
| <b>Ingredient (g/kg)</b>              |                                    |                                    |                                      |
| Corn                                  | 412.50                             | 442.62                             | 468.10                               |
| Wheat                                 | 150                                | 150                                | 150                                  |
| Soybean meal                          | 370                                | 243                                | 178                                  |
| Sunflower oil                         | 25                                 | 28                                 | 32                                   |
| Fullfat soybean                       | 0                                  | 60                                 | 80                                   |
| Sunflower meal                        | 0                                  | 40                                 | 60                                   |
| L-lizin                               | 3.2                                | 2.8                                | 2.3                                  |
| DL-Metionin                           | 3.76                               | 2.96                               | 2.39                                 |
| L-Treonin                             | 1.34                               | 0.92                               | 0.51                                 |
| Limestone                             | 14.5                               | 12                                 | 11                                   |
| MCP                                   | 10                                 | 8                                  | 6.5                                  |
| Salt                                  | 2.7                                | 2.7                                | 2.7                                  |
| Sodium bicarbonate                    | 1.5                                | 1.5                                | 1.5                                  |
| Anticoccidian (Sacox 120)             | 0.5                                | 0.5                                | 0                                    |
| Avizyme 1505 X                        | 0                                  | 0                                  | 0                                    |
| Premix <sup>1</sup>                   | 5                                  | 5                                  | 5                                    |
| Calculated nutrient content ( )       |                                    |                                    |                                      |
| AME <sub>n</sub> (MJ/kg) <sup>2</sup> | 12.50                              | 12.96                              | 13.26                                |
| Crude proteins                        | 22.0                               | 20.0                               | 18.6                                 |
| Lysine                                | 1.44                               | 1.25                               | 1.10                                 |
| Methionine + cysteine                 | 1.07                               | 0.95                               | 0.86                                 |
| Tryptophan                            | 0.26                               | 0.23                               | 0.21                                 |
| Threonine                             | 0.97                               | 0.84                               | 0.74                                 |
| Calcium                               | 0.92                               | 0.78                               | 0.71                                 |
| Available P                           | 0.50                               | 0.45                               | 0.42                                 |

<sup>1</sup>Vitamin-mineral premix contents per kg: 15 calcium 2.500.000 IU vitamin A, 1.000.000 IU vitamin D3, 16.800 mg vitamin E, 984 mg vitamin K3, 590.4 mg vitamin B1, 1.968 mg vitamin B2, 4.2 mg vitamin B12, 10.000 mg niacin, 2.952 mg pantothenic acid, 393.6 mg Folic acid, 40 mg biotin, 984 mg vitamin B6. 35.070 mg choline chloride, 29.008 mg betaine, 10.016 mg iron, 21.700 mg manganese, 3.200 mg copper, 20.160 mg zinc, 312.33 mg iodine, 63 mg selenium, 1.050 mg antioxidant, 200.000 FTU of Phytase (Aextra PHY).

<sup>2</sup>AMEn values were calculated according to EU regulation 152/2009.

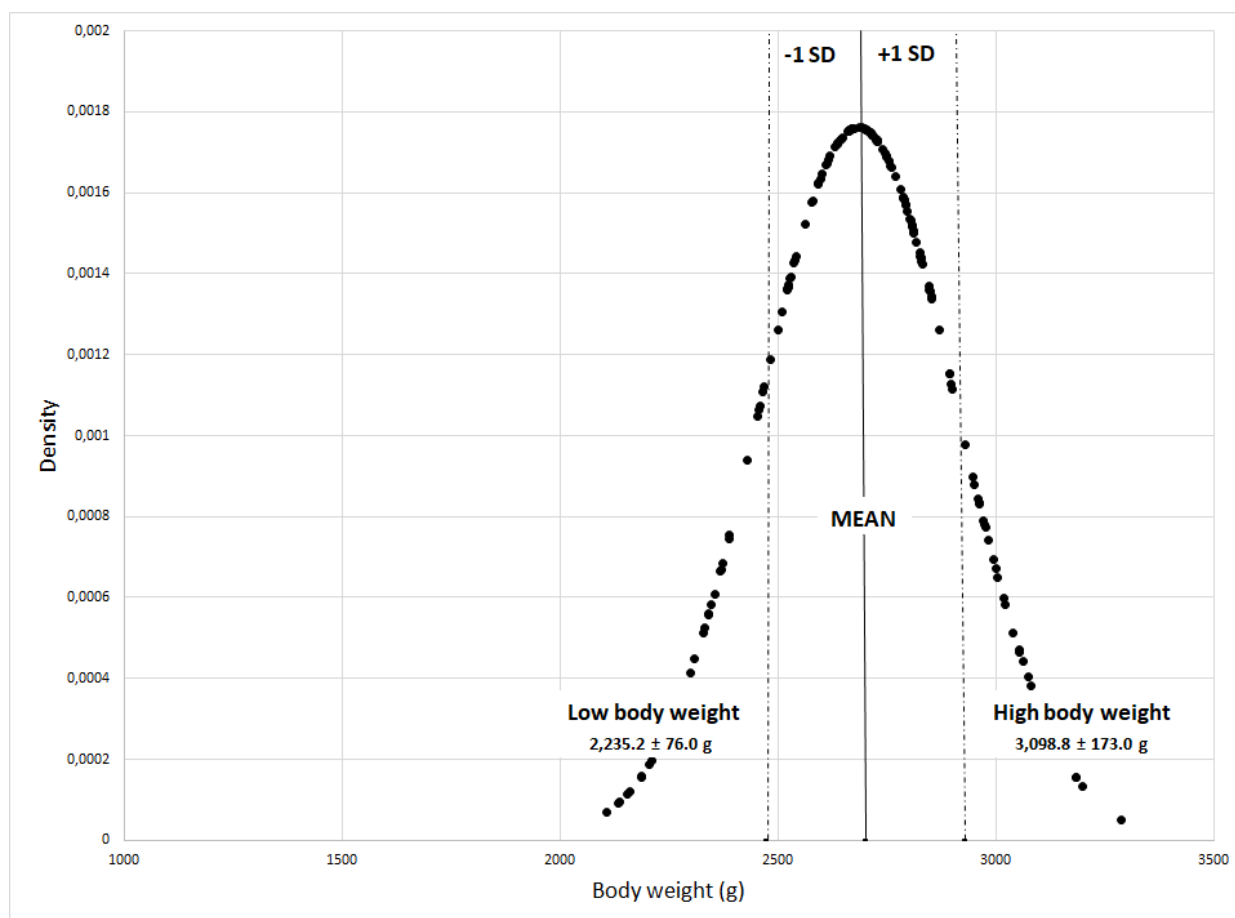

**Supplemental Figure S1.** Sampling strategy. A total of 160 male broiler chickens were weighed individually and average BW (mean  $\pm$  SD) were determined. For the selection. Five birds with heaviest body weight (mean BW +1 SD) and five lightest (mean BW -1 SD) were selected randomly and classify into two group with high or low live weight (HBW and LBW).

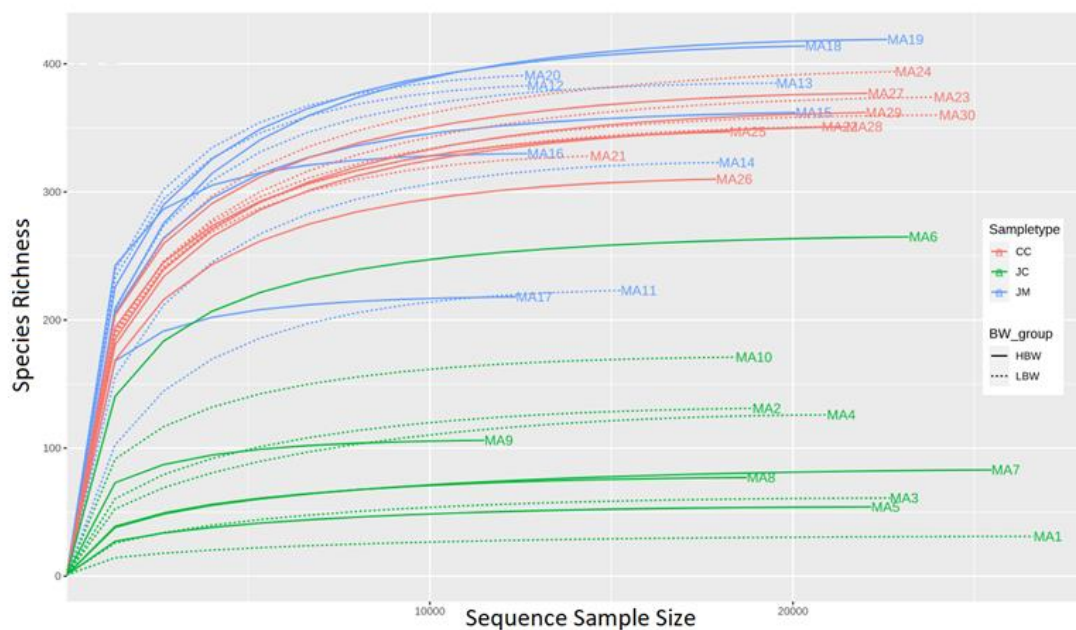

**Supplemental Figure S2.** The rarefaction curves of OTUs. The x-axis shows the number of valid sequences per sample and the y-axis shows the observed species (operational taxonomic units, OTUs). Each curve in the graph represents a different sample and the sample types shows in a different color, BW group indicates a solid (HBW) and dashed (LBW) line.

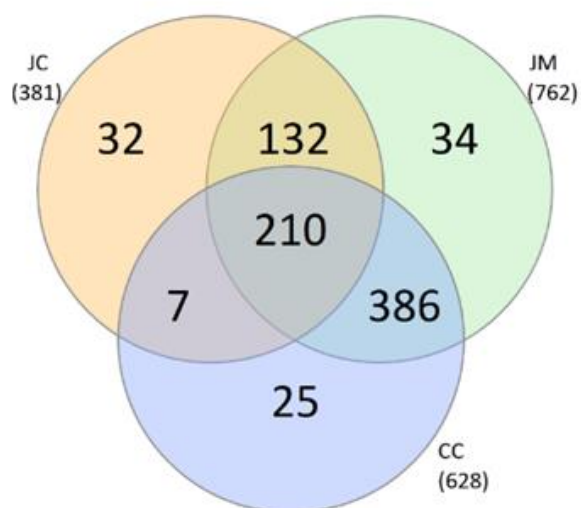

**Supplemental Figure S3.** Venn diagram show the number of OTUs that were shared or not shared in the jejunum mucosa (JM), jejunum content (JC), and caecum content (CC), or overlapped in the 3 examined groups.

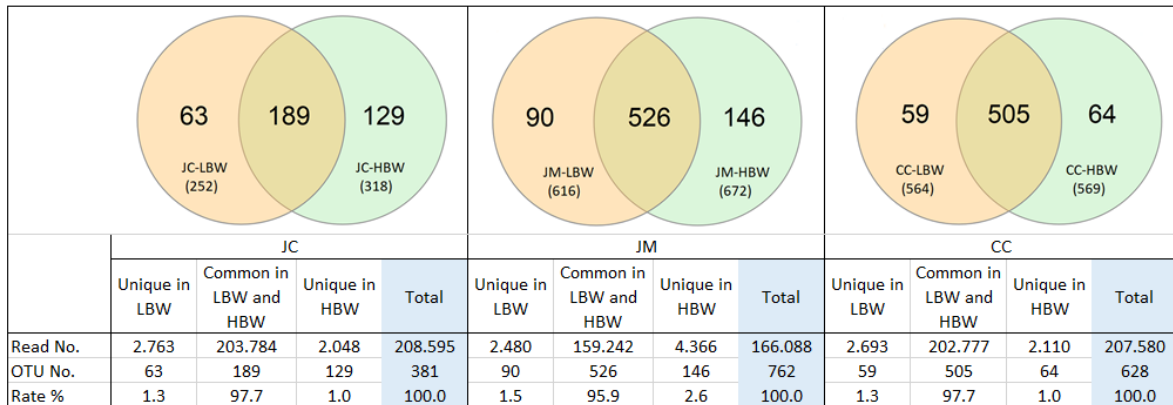

**Supplemental Figure S4.** Venn diagrams shows the number of OTUs in different intestinal sampling places according to the body weight (low and high BW) of chickens indicating in table their read numbers and rates (%).

**Supplemental Table S2.** Relative abundance of bacterial genera in the different sampling places of broiler chickens as affected by BW (%).

| Genus                                                                       | Body Weight | Sampling Place     |                    |                    | Mean (BW)          | FDR p-Values |                    |         |
|-----------------------------------------------------------------------------|-------------|--------------------|--------------------|--------------------|--------------------|--------------|--------------------|---------|
|                                                                             |             | Jejunal Chymus     | Jejunal Mucosa     | Caecum Chymus      |                    | SP           | BW                 | SP x BW |
| Actinobacteria                                                              |             |                    |                    |                    |                    |              |                    |         |
| <i>Corynebacterium-1</i>                                                    | LBW         | 2.06               | 0.97               | 0.00               | 1.01               |              |                    | 0.747   |
|                                                                             | HBW         | 3.51               | 0.24               | 0.01               | 1.25               |              | 0.877              |         |
|                                                                             | Mean (SP)   | 2.78               | 0.60               | 0.00               |                    | 0.323        |                    |         |
| Bacteroidetes (Class Bacteroidia)                                           |             |                    |                    |                    |                    |              |                    |         |
| <i>Alistipes</i>                                                            | LBW         | 0.00               | 0.64               | 0.82 <sup>B</sup>  | 0.48 <sup>B</sup>  |              |                    | 0.451   |
|                                                                             | HBW         | 0.03               | 1.71               | 2.48 <sup>A</sup>  | 1.41 <sup>A</sup>  |              | 0.081 <sup>T</sup> |         |
|                                                                             | Mean (SP)   | 0.01 <sup>b</sup>  | 1.17 <sup>a</sup>  | 1.65 <sup>a</sup>  |                    | 0.017        |                    |         |
| <i>Bacteroides</i>                                                          | LBW         | 0.11               | 19.06 <sup>B</sup> | 42.39              | 20.52 <sup>B</sup> |              |                    | 0.280   |
|                                                                             | HBW         | 0.76               | 34.28 <sup>A</sup> | 46.27              | 27.10 <sup>A</sup> |              | 0.098 <sup>T</sup> |         |
|                                                                             | Mean (SP)   | 0.43 <sup>c</sup>  | 26.67 <sup>b</sup> | 44.33 <sup>a</sup> |                    | 0.000        |                    |         |
| <i>Parabacteroides</i>                                                      | LBW         | 0.00               | 0.58               | 1.99               | 0.86               |              |                    | 0.509   |
|                                                                             | HBW         | 0.04               | 1.97               | 2.69               | 1.56               |              | 0.179              |         |
|                                                                             | Mean (SP)   | 0.02 <sup>c</sup>  | 1.27 <sup>b</sup>  | 2.34 <sup>a</sup>  |                    | 0.000        |                    |         |
| Firmicutes (Class Bacilli)                                                  |             |                    |                    |                    |                    |              |                    |         |
| <i>Bacillus</i>                                                             | LBW         | 0.01               | 0.55               | 0.13               | 0.23               |              |                    | 0.948   |
|                                                                             | HBW         | 0.03               | 0.65               | 0.09               | 0.25               |              | 0.907              |         |
|                                                                             | Mean (SP)   | 0.02 <sup>b</sup>  | 0.60 <sup>a</sup>  | 0.11 <sup>b</sup>  |                    | 0.024        |                    |         |
| <i>Enterococcus</i>                                                         | LBW         | 0.02 <sup>B</sup>  | 0.03               | 0.00               | 0.02 <sup>B</sup>  |              |                    | 0.001   |
|                                                                             | HBW         | 0.22 <sup>A</sup>  | 0.02               | 0.00               | 0.08 <sup>A</sup>  |              | 0.012              |         |
|                                                                             | Mean (SP)   | 0.123 <sup>a</sup> | 0.025 <sup>b</sup> | 0.002 <sup>b</sup> |                    | 0.000        |                    |         |
| <i>Lactobacillus</i>                                                        | LBW         | 65.94              | 21.87              | 2.90               | 30.24              |              |                    | 0.721   |
|                                                                             | HBW         | 64.24              | 7.23               | 7.23               | 25.07              |              | 0.646              |         |
|                                                                             | Mean (SP)   | 65.09 <sup>a</sup> | 14.55 <sup>b</sup> | 3.32 <sup>b</sup>  |                    | 0.000        |                    |         |
| <i>Streptococcus</i>                                                        | LBW         | 7.56               | 1.01               | 4.32               | 4.30               |              |                    | 0.690   |
|                                                                             | HBW         | 6.77               | 1.05               | 0.96               | 2.93               |              | 0.585              |         |
|                                                                             | Mean (SP)   | 7.17 <sup>a</sup>  | 1.03 <sup>b</sup>  | 2.64 <sup>b</sup>  |                    | 0.022        |                    |         |
| <i>Nosocomiicoccus</i>                                                      | LBW         | 0.15               | 0.06               | 0.00               | 0.07               |              |                    | 0.906   |
|                                                                             | HBW         | 0.10               | 0.04               | 0.00               | 0.05               |              | 0.680              |         |
|                                                                             | Mean (SP)   | 0.12               | 0.05               | 0.00               |                    | 0.208        |                    |         |
| <i>Lactococcus</i>                                                          | LBW         | 0.10               | 0.00               | 0.00               | 0.04               |              |                    | 0.595   |
|                                                                             | HBW         | 1.36               | 0.00               | 0.00               | 0.45               |              | 0.585              |         |
|                                                                             | Mean (SP)   | 0.73               | 0.00               | 0.00               |                    | 0.513        |                    |         |
| Firmicutes (Class Clostridia; Families Family XIII and Christensenellaceae) |             |                    |                    |                    |                    |              |                    |         |
| <i>Family XIII UCG-001</i>                                                  | LBW         | 0.00               | 0.06               | 0.08               | 0.05               |              |                    | 0.624   |
|                                                                             | HBW         | 0.00               | 0.13               | 0.15               | 0.09               |              | 0.323              |         |
|                                                                             | Mean (SP)   | 0.00 <sup>b</sup>  | 0.10 <sup>a</sup>  | 0.12 <sup>a</sup>  |                    | 0.013        |                    |         |
| <i>Christensenellaceae R-7</i>                                              | LBW         | 0.03               | 0.64               | 1.39               | 0.68               |              |                    | 0.476   |
|                                                                             | HBW         | 0.01               | 0.93               | 1.12               | 0.69               |              | 0.989              |         |
|                                                                             | Mean (SP)   | 0.02 <sup>c</sup>  | 0.78 <sup>b</sup>  | 1.25 <sup>a</sup>  |                    | 0.000        |                    |         |
| Firmicutes (Class Clostridia; Family Lachnospiraceae)                       |             |                    |                    |                    |                    |              |                    |         |
| <i>Anaerostipes</i>                                                         | LBW         | 0.01               | 0.12               | 0.13               | 0.09               |              |                    | 0.500   |
|                                                                             | HBW         | 0.00               | 0.17               | 0.06               | 0.08               |              | 0.821              |         |
|                                                                             | Mean (SP)   | 0.00 <sup>b</sup>  | 0.14 <sup>a</sup>  | 0.10 <sup>a</sup>  |                    | 0.007        |                    |         |
| <i>Blautia</i>                                                              | LBW         | 0.03               | 0.23               | 0.59               | 0.28               |              |                    | 0.417   |
|                                                                             | HBW         | 0.03               | 0.30               | 0.35               | 0.23               |              | 0.623              |         |
|                                                                             | Mean (SP)   | 0.03 <sup>c</sup>  | 0.26 <sup>b</sup>  | 0.47 <sup>a</sup>  |                    | 0.000        |                    |         |
| <i>CHKC1001</i>                                                             | LBW         | 0.01               | 0.04               | 0.26               | 0.11               |              |                    | 0.989   |
|                                                                             | HBW         | 0.02               | 0.03               | 0.28               | 0.11               |              | 0.955              |         |
|                                                                             | Mean (SP)   | 0.01 <sup>b</sup>  | 0.04 <sup>b</sup>  | 0.27 <sup>a</sup>  |                    | 0.024        |                    |         |
| <i>Eubacterium hallii group</i>                                             | LBW         | 0.02               | 0.17               | 0.56               | 0.25               |              |                    | 0.985   |
|                                                                             | HBW         | 0.02               | 0.09               | 0.49               | 0.20               |              | 0.796              |         |
|                                                                             | Mean (SP)   | 0.02               | 0.13               | 0.53               |                    | 0.067        |                    |         |
| <i>Eubacterium ventriosum</i>                                               | LBW         | 0.00               | 0.02               | 0.10               | 0.04               |              |                    | 0.919   |
|                                                                             | HBW         | 0.00               | 0.03               | 0.11               | 0.05               |              | 0.727              |         |
|                                                                             | Mean (SP)   | 0.00 <sup>b</sup>  | 0.02 <sup>b</sup>  | 0.11 <sup>a</sup>  |                    | 0.000        |                    |         |
| <i>GCA-900066575</i>                                                        | LBW         | 0.00               | 0.26               | 0.14               | 0.13               |              |                    | 0.680   |
|                                                                             | HBW         | 0.00               | 0.21               | 0.05               | 0.09               |              | 0.456              |         |
|                                                                             | Mean (SP)   | 0.00 <sup>c</sup>  | 0.24 <sup>a</sup>  | 0.09 <sup>b</sup>  |                    | 0.000        |                    |         |
| <i>Lachnoclostridium</i>                                                    | LBW         | 0.02               | 0.65               | 1.12               | 0.59               |              |                    |         |
|                                                                             | HBW         | 0.05               | 0.62               | 1.10               | 0.59               |              | 0.989              |         |

|                                                              |           |                    |                    |                    |                   |                    |
|--------------------------------------------------------------|-----------|--------------------|--------------------|--------------------|-------------------|--------------------|
|                                                              | Mean (SP) | 0.03 <sup>c</sup>  | 0.64 <sup>b</sup>  | 1.11 <sup>a</sup>  | 0.000             | 0.989              |
| <i>Ruminococcus torques</i><br>group                         | LBW       | 0.05               | 1.82               | 1.81               | 1.23              | 0.624              |
|                                                              | HBW       | 0.08               | 2.39               | 1.12               | 1.20              | 0.970              |
|                                                              | Mean (SP) | 0.06 <sup>b</sup>  | 2.11 <sup>a</sup>  | 1.46 <sup>a</sup>  | 0.008             |                    |
| <i>Sellimonas</i>                                            | LBW       | 0.01               | 0.32               | 0.49               | 0.27              | 0.991              |
|                                                              | HBW       | 0.02               | 0.31               | 0.49               | 0.27              | 0.995              |
|                                                              | Mean (SP) | 0.02 <sup>c</sup>  | 0.31 <sup>b</sup>  | 0.49 <sup>a</sup>  | 0.000             |                    |
| <i>Tyzzereella</i>                                           | LBW       | 0.00               | 0.19               | 0.29               | 0.16              | 0.610              |
|                                                              | HBW       | 0.00               | 0.40               | 0.27               | 0.22              | 0.624              |
|                                                              | Mean (SP) | 0.00 <sup>b</sup>  | 0.29 <sup>a</sup>  | 0.28 <sup>a</sup>  | 0.025             |                    |
| Firmicutes (Class Clostridia; Family Ruminococcaceae)        |           |                    |                    |                    |                   |                    |
| <i>Anaerofilum</i>                                           | LBW       | 0.00               | 0.17               | 0.09               | 0.09              | 0.885              |
|                                                              | HBW       | 0.02               | 0.18               | 0.07               | 0.09              | 0.962              |
|                                                              | Mean (SP) | 0.01 <sup>b</sup>  | 0.17 <sup>a</sup>  | 0.08 <sup>b</sup>  | 0.003             |                    |
| <i>Butyricoccus</i>                                          | LBW       | 0.02               | 0.49               | 0.85               | 0.45              | 0.327              |
|                                                              | HBW       | 0.05               | 0.45               | 0.52               | 0.34              | 0.346              |
|                                                              | Mean (SP) | 0.03 <sup>c</sup>  | 0.47 <sup>b</sup>  | 0.69 <sup>a</sup>  | 0.000             |                    |
| <i>DTU089</i>                                                | LBW       | 0.01               | 0.24               | 0.16               | 0.14              | 0.699              |
|                                                              | HBW       | 0.00               | 0.15               | 0.10               | 0.08              | 0.372              |
|                                                              | Mean (SP) | 0.00 <sup>b</sup>  | 0.20 <sup>a</sup>  | 0.13 <sup>a</sup>  | 0.002             |                    |
| <i>Eubacterium-</i><br><i>coprostanoligenes-group</i>        | LBW       | 0.00               | 1.07               | 1.03               | 0.70              | 0.810              |
|                                                              | HBW       | 0.02               | 1.27               | 0.99               | 0.76              | 0.740              |
|                                                              | Mean (SP) | 0.01 <sup>b</sup>  | 1.17 <sup>a</sup>  | 1.01 <sup>a</sup>  | 0.000             |                    |
| <i>Faecalibacterium</i>                                      | LBW       | 0.01               | 3.15               | 3.08               | 2.08              | 0.683              |
|                                                              | HBW       | 0.00               | 2.45               | 1.33               | 1.26              | 0.503              |
|                                                              | Mean (SP) | 0.01 <sup>b</sup>  | 2.80 <sup>a</sup>  | 2.20 <sup>a</sup>  | 0.031             |                    |
| <i>Fournierella</i>                                          | LBW       | 0.00               | 0.29               | 0.24               | 0.18              | 0.417              |
|                                                              | HBW       | 0.02               | 0.61               | 0.28               | 0.30              | 0.323              |
|                                                              | Mean (SP) | 0.01 <sup>b</sup>  | 0.45 <sup>a</sup>  | 0.26 <sup>a</sup>  | 0.001             |                    |
| <i>Negativibacillus</i>                                      | LBW       | 0.00               | 0.17               | 1.13 <sup>A</sup>  | 0.44              | 0.027              |
|                                                              | HBW       | 0.00               | 0.20               | 0.59 <sup>B</sup>  | 0.26              | 0.127              |
|                                                              | Mean (SP) | 0.00 <sup>b</sup>  | 0.19 <sup>b</sup>  | 0.86 <sup>a</sup>  | 0.000             |                    |
| <i>Oscillibacter</i>                                         | LBW       | 0.00               | 0.66               | 0.70               | 0.46              | 0.690              |
|                                                              | HBW       | 0.00               | 0.89               | 0.69               | 0.53              | 0.660              |
|                                                              | Mean (SP) | 0.00 <sup>b</sup>  | 0.77 <sup>a</sup>  | 0.70 <sup>a</sup>  | 0.000             |                    |
| <i>Ruminiclostridium 5</i>                                   | LBW       | 0.00               | 0.28               | 0.44               | 0.24              | 0.260              |
|                                                              | HBW       | 0.00               | 0.38               | 0.23               | 0.21              | 0.665              |
|                                                              | Mean (SP) | 0.00 <sup>b</sup>  | 0.33 <sup>a</sup>  | 0.34 <sup>a</sup>  | 0.000             |                    |
| <i>Ruminococcaceae NK4A214</i>                               | LBW       | 0.01               | 0.35               | 0.82               | 0.40              | 0.342              |
|                                                              | HBW       | 0.01               | 0.44               | 1.79               | 0.75              | 0.329              |
|                                                              | Mean (SP) | 0.01 <sup>b</sup>  | 0.39 <sup>b</sup>  | 1.31 <sup>a</sup>  | 0.001             |                    |
| <i>Ruminococcaceae UCG-005</i>                               | LBW       | 0.01               | 1.03               | 0.70               | 0.58              | 0.727              |
|                                                              | HBW       | 0.01               | 1.51               | 0.70               | 0.74              | 0.665              |
|                                                              | Mean (SP) | 0.01 <sup>b</sup>  | 1.27 <sup>a</sup>  | 0.70 <sup>ab</sup> | 0.009             |                    |
| <i>Ruminococcaceae UCG-010</i>                               | LBW       | 0.00               | 0.09 <sup>B</sup>  | 0.19               | 0.09 <sup>B</sup> | 0.472              |
|                                                              | HBW       | 0.00               | 0.24 <sup>A</sup>  | 0.29               | 0.18 <sup>A</sup> | 0.083 <sup>T</sup> |
|                                                              | Mean (SP) | 0.00 <sup>b</sup>  | 0.17 <sup>a</sup>  | 0.24 <sup>a</sup>  | 0.000             |                    |
| <i>Ruminococcaceae UCG-013</i>                               | LBW       | 0.01               | 0.09               | 0.39 <sup>A</sup>  | 0.17 <sup>A</sup> | 0.026              |
|                                                              | HBW       | 0.01               | 0.06               | 0.18 <sup>B</sup>  | 0.08 <sup>B</sup> | 0.020              |
|                                                              | Mean (SP) | 0.010 <sup>b</sup> | 0.078 <sup>b</sup> | 0.285 <sup>a</sup> | 0.000             |                    |
| <i>Ruminococcaceae UCG-014</i>                               | LBW       | 0.02               | 2.47               | 3.46               | 1.98              | 0.690              |
|                                                              | HBW       | 0.15               | 3.70               | 4.79               | 2.88              | 0.341              |
|                                                              | Mean (SP) | 0.09 <sup>b</sup>  | 3.09 <sup>a</sup>  | 4.12 <sup>a</sup>  | 0.000             |                    |
| <i>Subdoligranulum</i>                                       | LBW       | 0.04               | 0.29               | 0.90               | 0.41              | 0.803              |
|                                                              | HBW       | 0.14               | 0.64               | 1.11               | 0.63              | 0.371              |
|                                                              | Mean (SP) | 0.09 <sup>b</sup>  | 0.46 <sup>b</sup>  | 1.01 <sup>a</sup>  | 0.000             |                    |
| Firmicutes (Class Negativicutes and Erysipelotrichia)        |           |                    |                    |                    |                   |                    |
| <i>Phascolarctobacterium</i>                                 | LBW       | 0.03               | 1.38               | 3.98               | 1.80              | 0.607              |
|                                                              | HBW       | 0.03               | 1.01               | 2.06               | 1.03              | 0.475              |
|                                                              | Mean (SP) | 0.03 <sup>b</sup>  | 1.19 <sup>b</sup>  | 3.02 <sup>a</sup>  | 0.008             |                    |
| <i>Erysipelatoclostridium</i>                                | LBW       | 0.00               | 0.22               | 0.68               | 0.30              | 0.381              |
|                                                              | HBW       | 0.01               | 0.01               | 0.38               | 0.16              | 0.112              |
|                                                              | Mean (SP) | 0.01 <sup>b</sup>  | 0.15 <sup>b</sup>  | 0.53 <sup>a</sup>  | 0.000             |                    |
| Proteobacteria                                               |           |                    |                    |                    |                   |                    |
| <i>Burkholderia-Caballeronia-</i><br><i>Paraburkholderia</i> | LBW       | 0.00               | 0.11               | 0.00               | 0.26              | 0.471              |
|                                                              | HBW       | 0.00               | 0.10               | 0.00               | 0.19              | 0.630              |
|                                                              | Mean (SP) | 0.00 <sup>b</sup>  | 0.11 <sup>a</sup>  | 0.00 <sup>b</sup>  | 0.036             |                    |
| <i>Enterobacter</i>                                          | LBW       | 0.06               | 0.45               | 0.00               | 0.25              | 0.985              |

|                             |                  |                         |                         |                         |             |       |       |
|-----------------------------|------------------|-------------------------|-------------------------|-------------------------|-------------|-------|-------|
|                             | HBW              | 0.02                    | 0.02                    | 0.00                    | <b>0.20</b> | 0.796 |       |
|                             | <b>Mean (SP)</b> | <b>0.02</b>             | <b>0.13</b>             | <b>0.53</b>             |             | 0.067 |       |
| <i>Escherichia-Shigella</i> | LBW              | 0.98                    | 0.65                    | 1.79                    | <b>1.14</b> |       | 0.157 |
|                             | HBW              | 8.18                    | 0.37                    | 0.64                    | <b>3.06</b> | 0.450 |       |
|                             | <b>Mean (SP)</b> | <b>4.58</b>             | <b>0.51</b>             | <b>1.22</b>             |             | 0.190 |       |
| <i>Paracoccus</i>           | LBW              | 0.01                    | 0.09                    | 0.00                    | <b>0.03</b> |       | 0.683 |
|                             | HBW              | 0.12                    | 0.09                    | 0.00                    | <b>0.07</b> | 0.646 |       |
|                             | <b>Mean (SP)</b> | <b>0.064</b>            | <b>0.089</b>            | <b>0.00</b>             |             | 0.577 |       |
| <i>Bilophila</i>            | LBW              | 0.02                    | 0.23                    | 0.53                    | <b>0.04</b> |       | 0.989 |
|                             | HBW              | 0.00                    | 0.33                    | 0.23                    | <b>0.03</b> | 0.929 |       |
|                             | <b>Mean (SP)</b> | <b>0.01<sup>b</sup></b> | <b>0.28<sup>a</sup></b> | <b>0.38<sup>a</sup></b> |             | 0.017 |       |

Bacterial genera differences between groups were assessed using two-way ANOVA test, with Benjamini-Hochberg false discovery rate (FDR) correction. FDR-corrected p-values below 0.05 were considered significant and results between 0.05 and 0.1 ( $0.05 < p < 0.10$ ) were considered a trend (T). Body weight (BW) effect at each sampling places (SP) were also compared with one-way ANOVA test and the significance of Tukey's HSD multiple group comparison's Post hoc tests was indicated at  $p < 0.05$ . a,b,c: values within the mean (SP) rows with different lowercase letters were significantly different ( $p < 0.05$ ). A, B: values within the mean columns with different capital letters superscripts were significantly different ( $p < 0.05$ ).



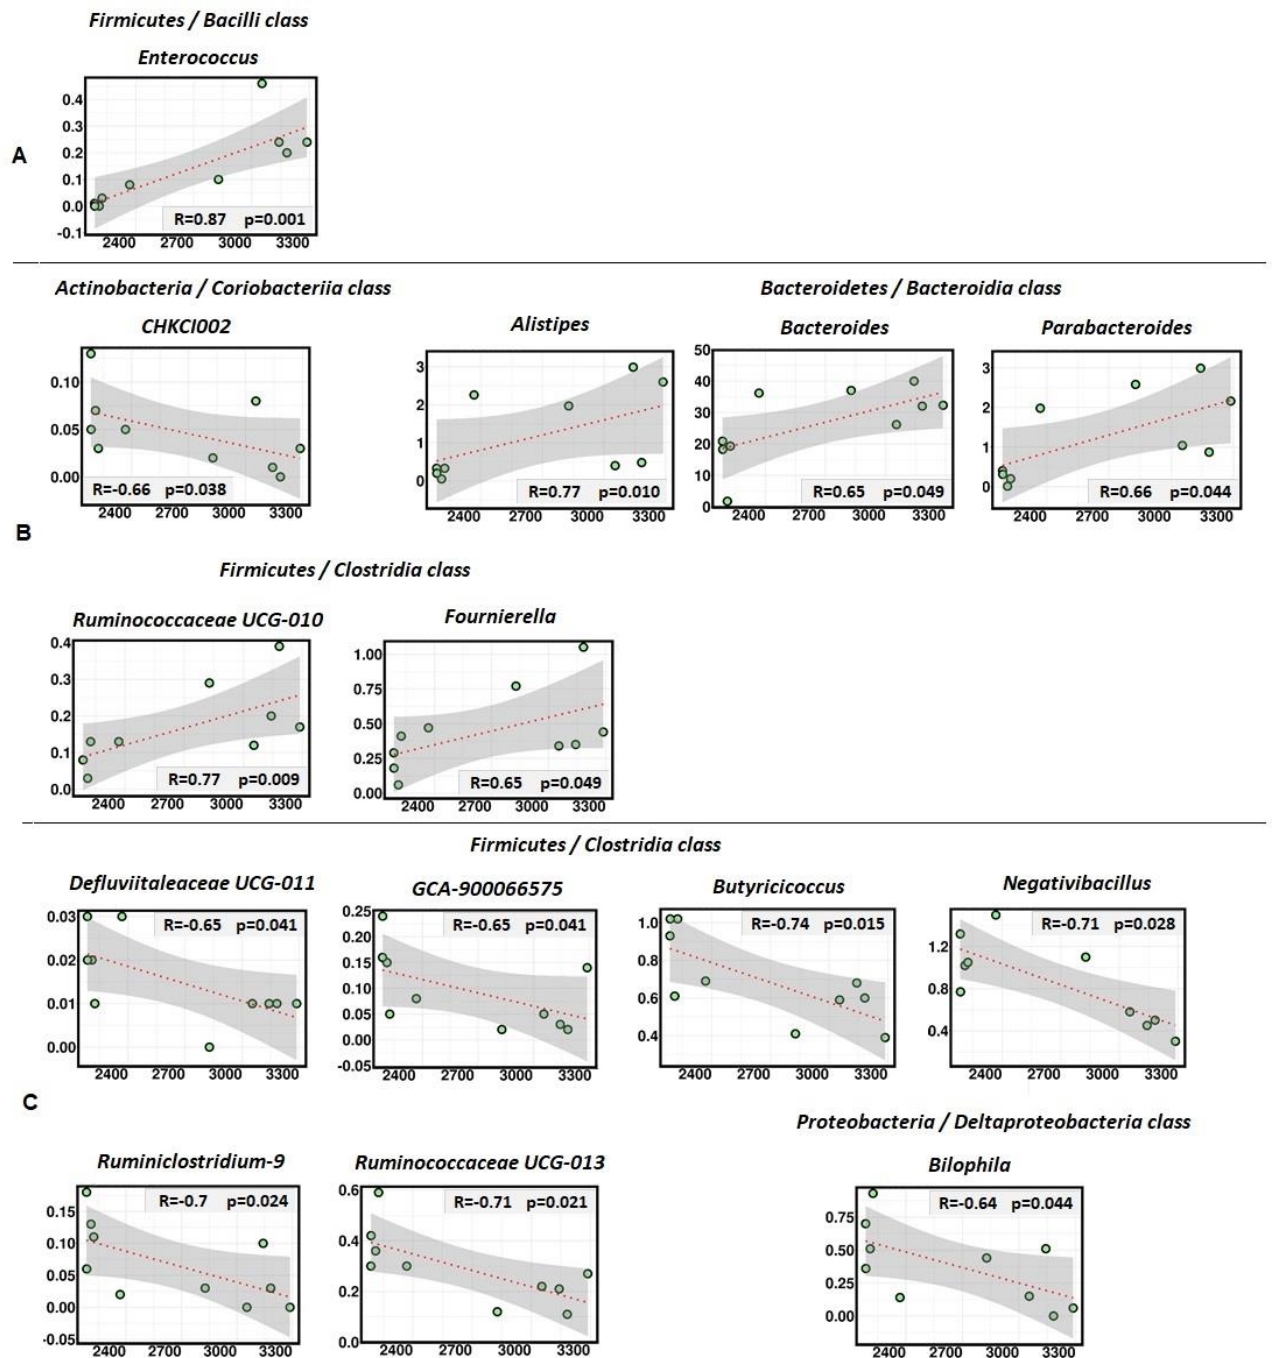

**Supplemental Figure S5.** Correlation between body weight (g) and genus abundance in the different intestinal samples. (A) Correlation in jejunum chymus; (B) in jejunum mucosa and (C) in caecum chymus.
